# Supplementary material for: Transcription factor c-Maf deletion improves streptozotocin-induced diabetic nephropathy by directly regulating Sglt2 and Glut2
Source: JCI journal article supplement (doi:10.1172/jci.insight.163306), 2023-02-14
Supplement: sd1 [file 1]

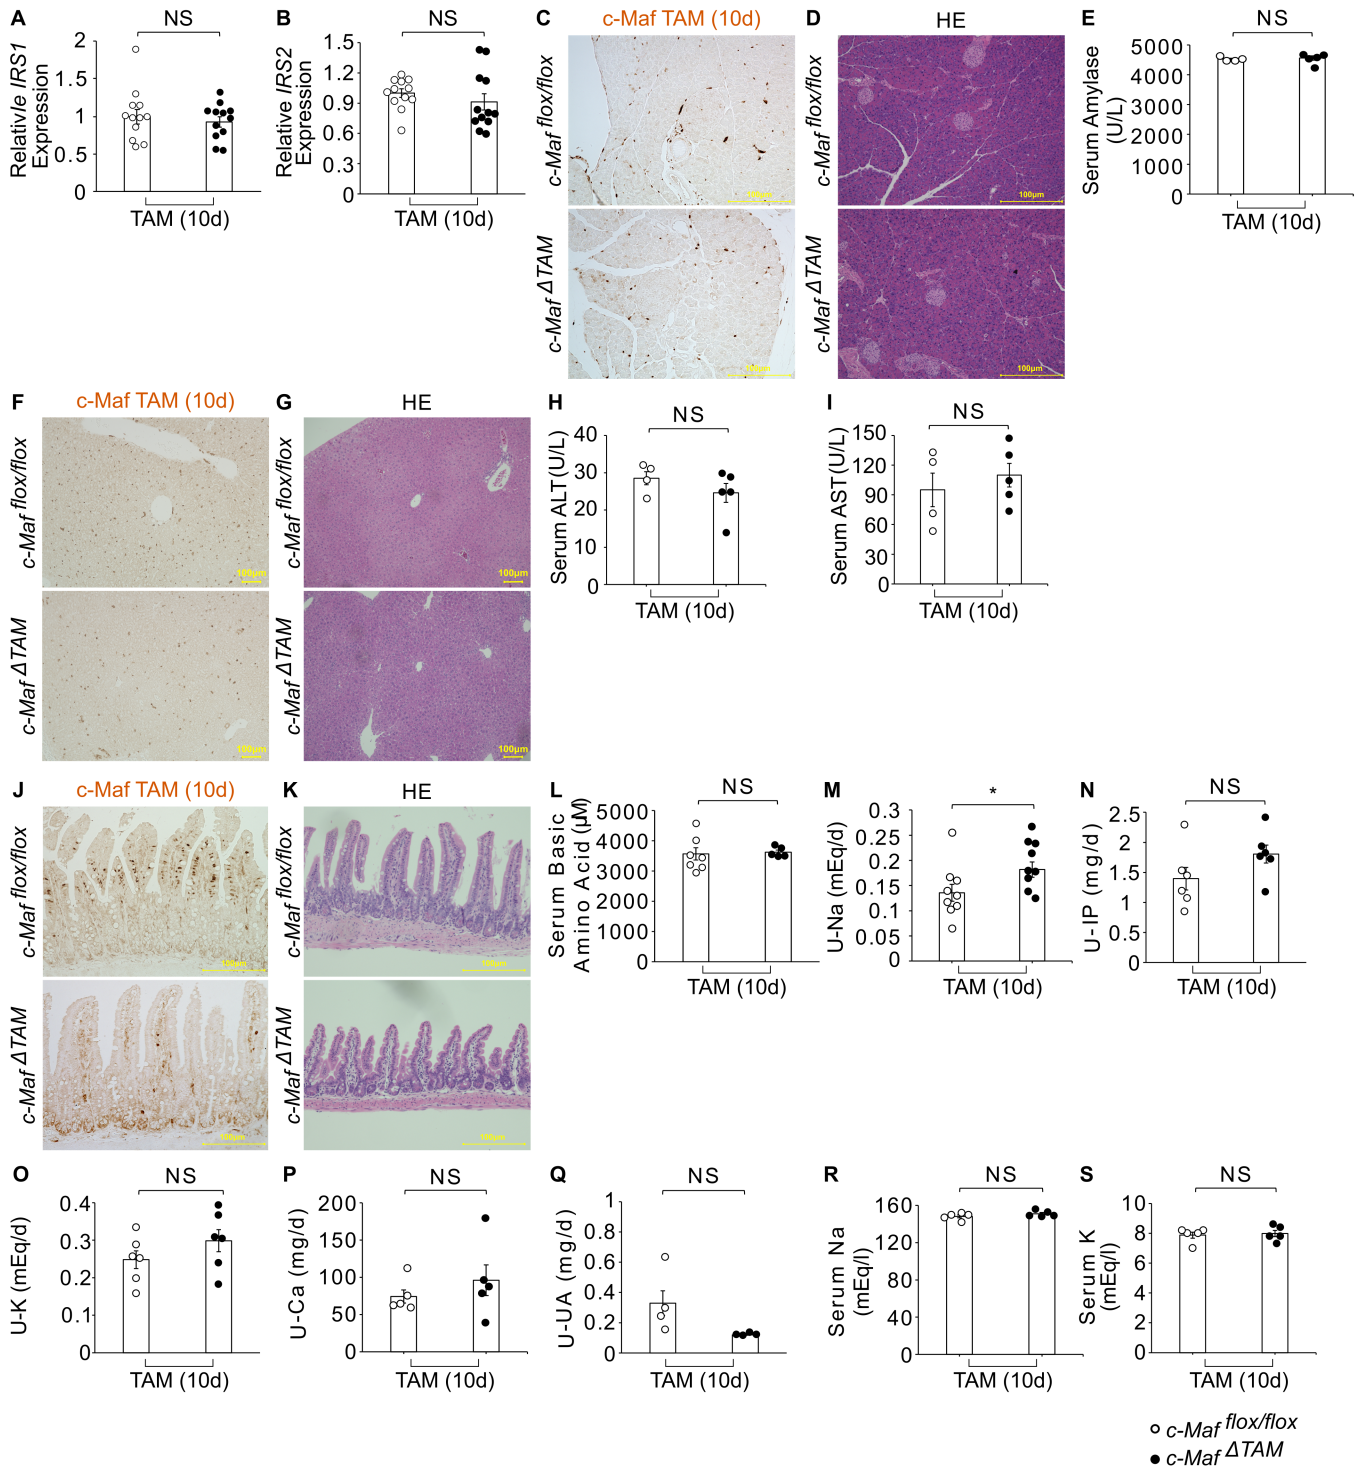

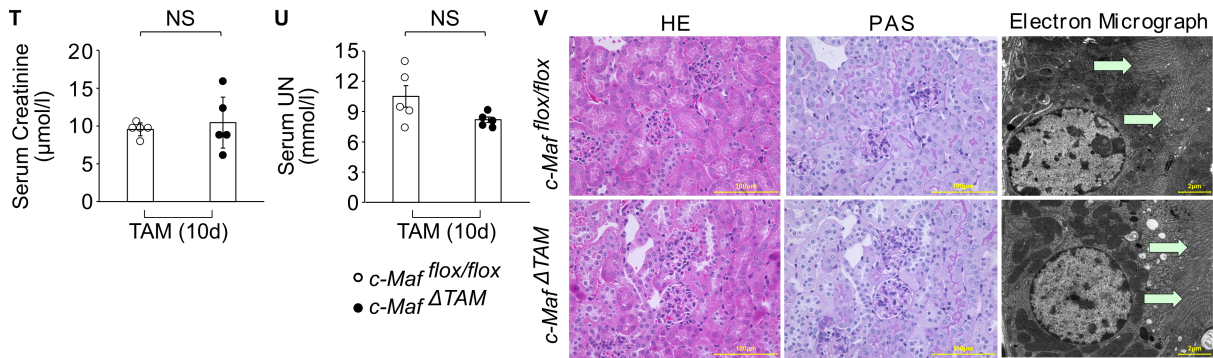

**Supplemental Figure 1. *c-Maf<sup>ΔTAM</sup>* and *c-Maf<sup>flox/flox</sup>* mice showed comparable pancreas, liver, small intestine and kidney function and structure, but decreased albumin reabsorption in the proximal tubules and excess basic amino acid excretion.** (A) *IRS1* and (B) *IRS2* mRNA levels were analyzed in kidney tissues extracted from *c-Maf<sup>flox/flox</sup>* and *c-Maf<sup>ΔTAM</sup>* mice using qPCR (n = 12 per group). (C) *c-Maf* expression around the exocrine cells, such as the macrophages and interstitial area. (D) No morphological changes in the pancreas and (E) no significant difference in amylase levels in the serum under the feeding conditions in *c-Maf<sup>ΔTAM</sup>* mice compared with those in *c-Maf<sup>flox/flox</sup>* mice on TAM(10d). (E) Serum Amylase levels did not significantly differ between the two groups. (F) *c-Maf* expression around the hepatic cells, such as sinusoidal cells and macrophages. (G) No morphological changes in the liver and no significant difference in (H) ALT and (I) AST levels in the serum on TAM(10d). (*c-Maf<sup>flox/flox</sup>*, n = 4; *c-Maf<sup>ΔTAM</sup>*, n = 5). (J) *c-Maf* expression and (K) no morphological changes in the small intestine. [C, D, F, G, J, K: n = 4 per group. E, H, I: *c-Maf<sup>flox/flox</sup>*, n = 4; *c-Maf<sup>ΔTAM</sup>*, n = 5.] An almost identical metabolic phenotype was documented in *c-Maf<sup>flox/flox</sup>* and *c-Maf<sup>ΔTAM</sup>* kidneys. (L) Serum basic amino acid, (M) Urine Na, (N) Urine IP, (O) Urine K, (P) Urine Ca, (Q) Urine UA, (R) Serum Na and (S) Serum K levels did not significantly differ between the two groups [L: *c-Maf<sup>flox/flox</sup>*, n = 7; *c-Maf<sup>ΔTAM</sup>*, n = 5. M, N, O: n = 5. Q: n = 4. P, R, S: n = 5]. (T) Serum creatinine and (U) serum UN levels did not differ significantly between the two groups (n = 5 per group). The structures of glomeruli, proximal tubules, and brush border membranes in *c-Maf<sup>flox/flox</sup>* and *c-Maf<sup>ΔTAM</sup>* were analyzed using electron microscopy in (V) HE-stained and PAS-stained kidney tissues (n = 4 per group). Green arrows indicate the brush border membrane. Scale bars: 100 μm for IHC, HE, and PAS staining, and 2 μm for electron microscopy images. Supplemental Figure 1A, B, E, H, I, L–U were presented as the mean and the standard error of the mean (SEM). To assess whether differences between *c-Maf<sup>ΔTAM</sup>* and *c-Maf<sup>flox/flox</sup>* mice were statistically significant, a minimum of three biological replicates were analyzed using Welch's t test, and a P-value < 0.05 was considered significant. NS: not significant, \*P < 0.05, \*\*\*P < 0.001. White circles- *c-Maf<sup>flox/flox</sup>* groups, and black circles- *c-Maf<sup>ΔTAM</sup>* groups.

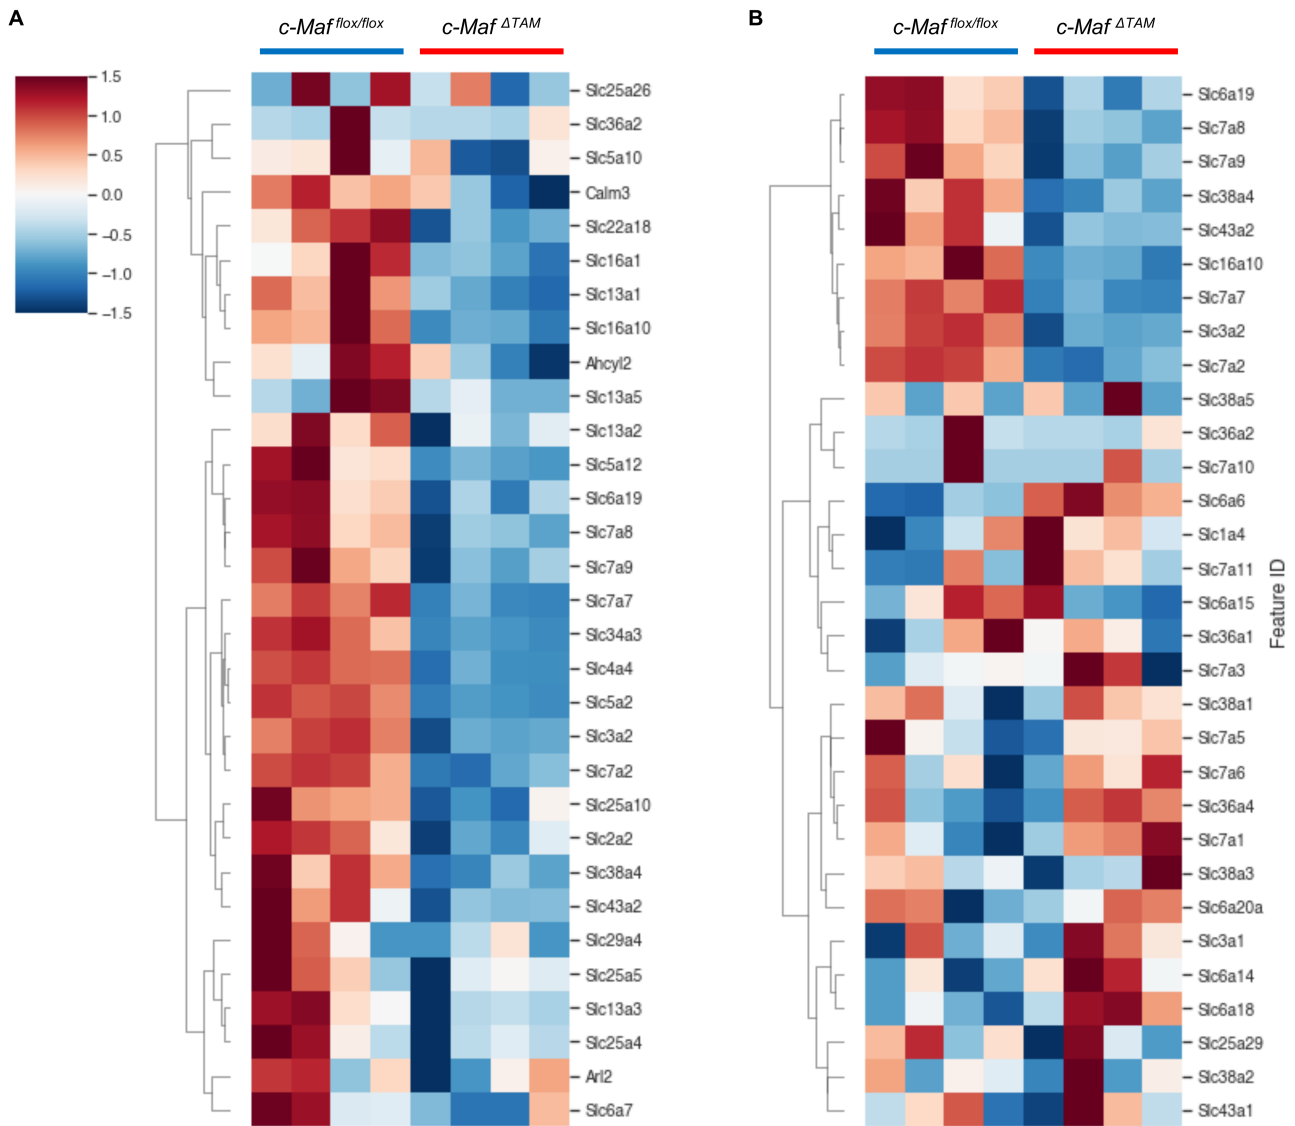

**Supplemental Figure 2. RNA-seq analysis of the relationship between *c-Maf* and renal features. (A) Heatmap of cluster2 expression, which clearly differed between *c-Maf<sup>ΔTAM</sup>* and *c-Maf<sup>flox/flox</sup>* mice. (B) Heatmap of gene expression specific to the Metabolism of amino acids and derivatives ( $n = 4$  per group).**

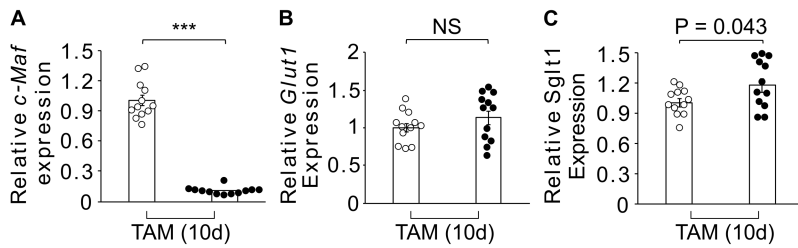

**Supplemental Figure 3. qPCR results showing a significant decrease in *c-Maf* expression, comparable *Glut1* expression, and an increase in *SglT1* expression in *c-Maf*<sup>ΔTAM</sup> mice compared to those in *c-Maf*<sup>fllox/fllox</sup> mice.** The renal mRNA levels of (A) *c-Maf* were significantly lower, (B) *Glut1* levels did not change in both groups, and (C) *SglT1* was upregulated to compensate for reduced *SglT2* in *c-Maf*<sup>ΔTAM</sup> compared to *c-Maf*<sup>fllox/fllox</sup> group at TAM(10d). [A, B, C: n=12 per group]. Supplemental Figure 3A–C were presented as the mean and the standard error of the mean (SEM). To assess whether differences between *c-Maf*<sup>ΔTAM</sup> and *c-Maf*<sup>fllox/fllox</sup> mice were statistically significant, a minimum of three biological replicates were analyzed using Welch's t test, and a P-value < 0.05 was considered significant. NS: Not Significant, and \*\*\*P < 0.001. White circles- *c-Maf*<sup>fllox/fllox</sup> groups, and black circles- *c-Maf*<sup>ΔTAM</sup> groups.

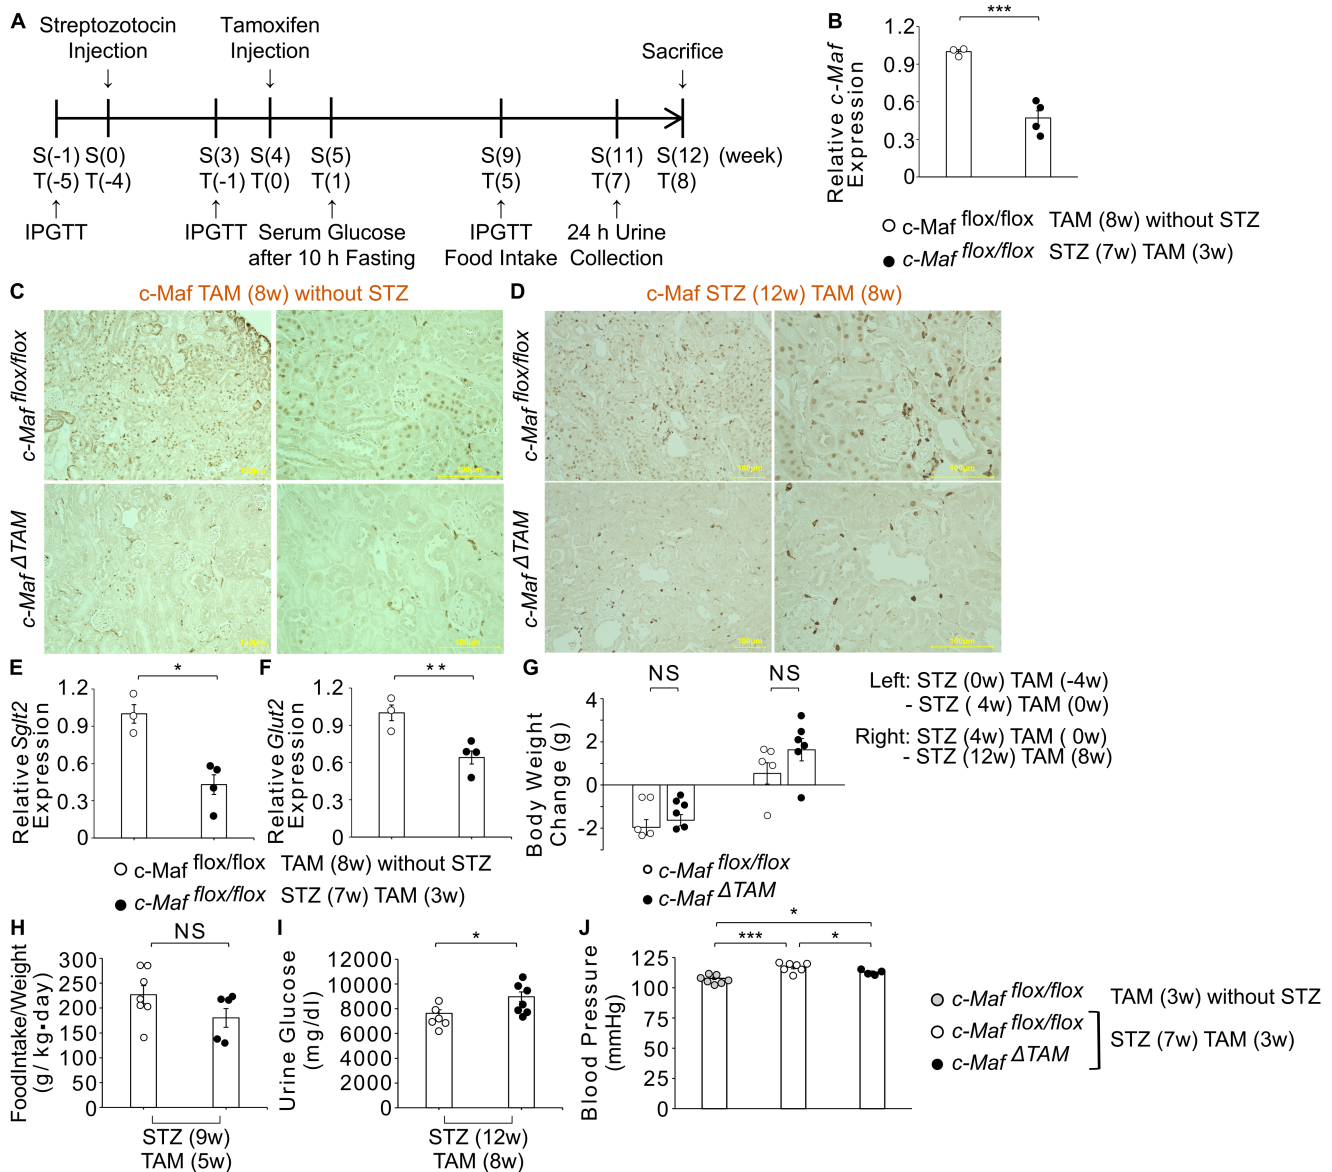

**Supplemental Figure 4. Schedule of streptozotocin and tamoxifen administration, detection of *c-Maf* expression and localization, and body weight, food intake, urinary glucose levels, and blood pressure in *c-Maf*<sup>ΔTAM</sup> and *c-Maf*<sup>flx/flx</sup> mice under diabetic and/or non-diabetic conditions.** (A) S, streptozotocin (STZ); T, tamoxifen (TAM); IPGTT, intraperitoneal glucose tolerance test. Numbers in parentheses indicate the number of weeks after STZ or TAM administration. Under diabetic conditions, (B) *c-Maf* gene expression was significantly lower in the kidneys of *c-Maf*<sup>flx/flx</sup> mice on STZ(7w) TAM(3w) compared to TAM(8w) without STZ. There was no change in *c-Maf* localization between these groups on (C) TAM(8w) without STZ or (D) STZ(12w) TAM(8w). (E) *Sglt2* and (F) *Glut2* gene expression was significantly lower in the kidneys of *c-Maf*<sup>flx/flx</sup> mice on STZ(7w) TAM(3w) compared to TAM(8w) without STZ. [B, E, F: *n* = 3 on TAM(8w) without STZ; *n* = 4 on STZ(7w) TAM(3w). C, D: *n* = 3 per group.] (G) Body weight did not significantly differ between the groups on STZ(4w) TAM(0w). A tendency for increased body weight was observed in *c-Maf*<sup>ΔTAM</sup> mice at STZ(12w) TAM(8w) compared to control mice (*c-Maf*<sup>flx/flx</sup>, *n* = 5; *c-Maf*<sup>ΔTAM</sup>, *n* = 6). (H) Food intake did not significantly differ between the groups on STZ(9w) TAM(5w) (*c-Maf*<sup>flx/flx</sup>, *n* = 7; *c-Maf*<sup>ΔTAM</sup>, *n* = 5). (I) Urinary glucose levels were higher in *c-Maf*<sup>ΔTAM</sup> mice than in control mice on STZ(12w) TAM(8w) (*c-Maf*<sup>flx/flx</sup>, *n* = 6; *c-Maf*<sup>ΔTAM</sup>, *n* = 7). (J) Blood pressure was lower in *c-Maf*<sup>ΔTAM</sup> mice than in control mice (*c-Maf*<sup>flx/flx</sup> on TAM(3w) without STZ and STZ(7w) TAM(3w), *n* = 7; *c-Maf*<sup>ΔTAM</sup> on STZ(7w) TAM(3w), *n* = 4). Scale bars: 100 μm. Supplemental Figure 4B, E–J were presented as the mean and the standard error of the mean (SEM). To assess whether differences between *c-Maf*<sup>ΔTAM</sup> and *c-Maf*<sup>flx/flx</sup> mice were statistically significant, a minimum of three biological replicates were analyzed using Welch's t test, and a P-value < 0.05 was considered significant. Holm corrections were applied for multiple statistical tests in Supplemental Figure 4J. NS: not significant, \**P* < 0.05, \*\*\**P* < 0.001. White circles- *c-Maf*<sup>flx/flx</sup> groups, and black circles- *c-Maf*<sup>ΔTAM</sup> groups.

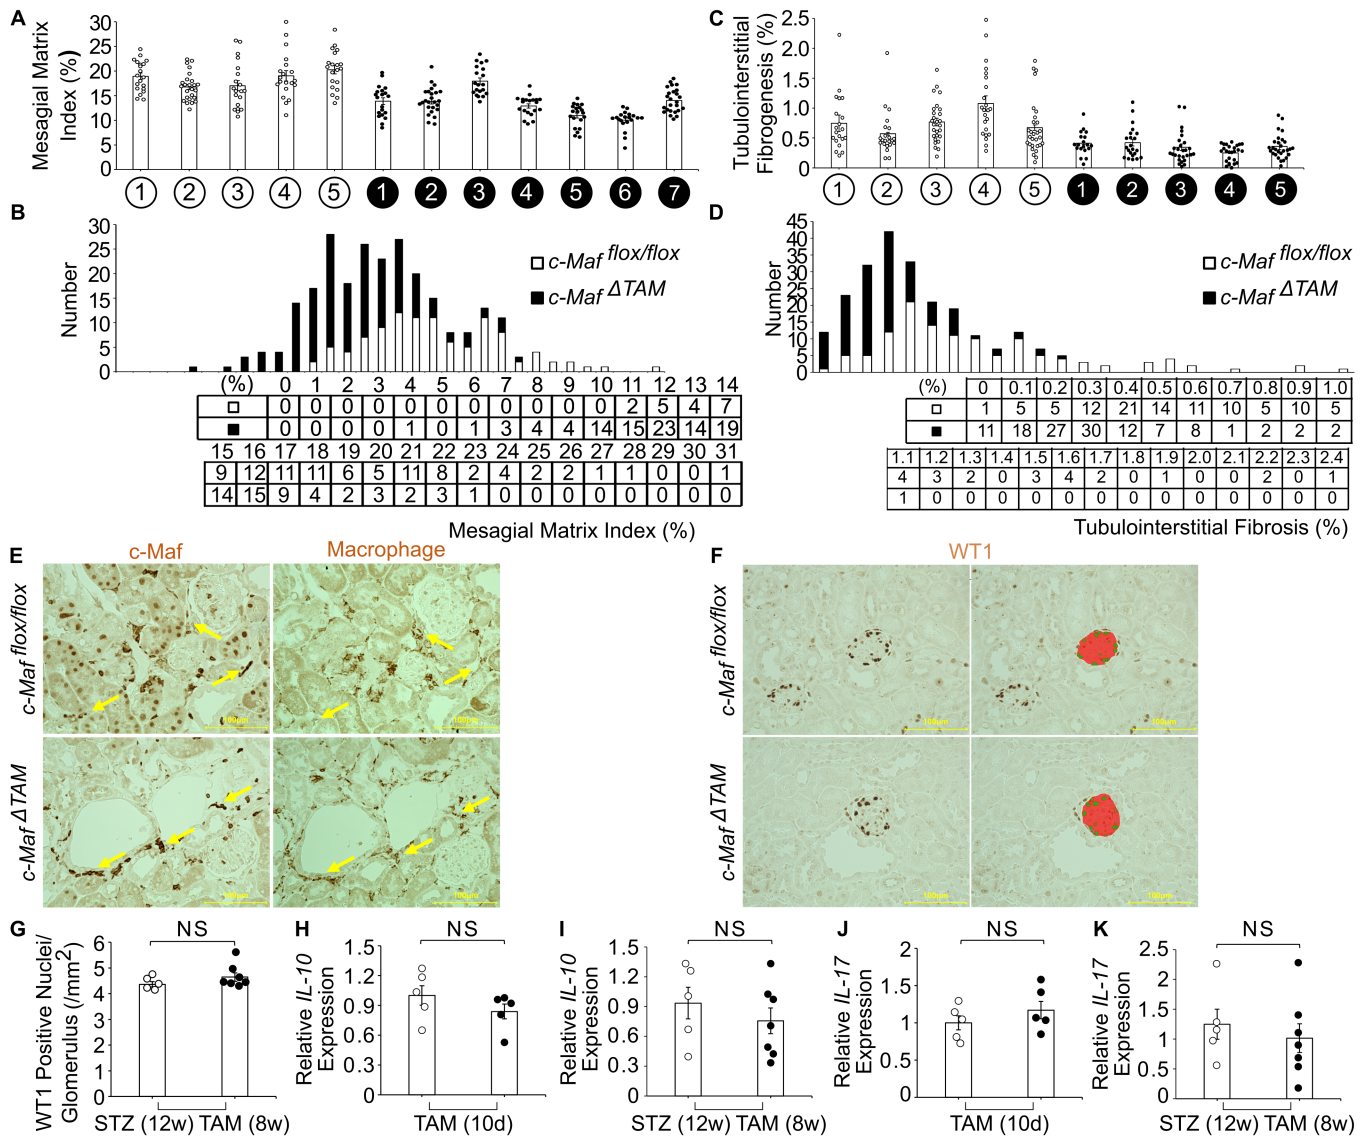

**Supplemental Figure 5. Morphometric analysis of glomerular and fibrosis, immunohistochemical staining for macrophage with c-Maf and WT1 expression, and qPCR analysis of IL-10 and IL-17.** (A) Mesangial matrix indexes, (B) their frequency distribution, (C) ratio of tubulointerstitial fibrogenesis, and (D) their frequency distribution for all samples in both groups are displayed. [A, B: *c-Maf*<sup>flx/flx</sup>, n=5; *c-Maf*<sup>ΔTAM</sup>, n=7. C, D: n=5 per both groups.] (E) Co-staining of macrophage with c-Maf showed infiltration of the macrophages expressing c-Maf into the kidneys in both groups. [E: n=3 per both groups.] (F) IHC staining for WT1, and (G) the quantitative evaluation showing no significant difference in the number of WT1 positive nuclei per glomerular size. [F: n=3 per both groups. G: *c-Maf*<sup>flx/flx</sup>, n=5; *c-Maf*<sup>ΔTAM</sup>, n=7.] Comparable expression level of (H and I) *IL-10* and (J and K) *IL-17* on TAM(10d) and STZ (12w) TAM (8w), respectively. [I, K *c-Maf*<sup>flx/flx</sup>, n=5; *c-Maf*<sup>ΔTAM</sup>, n=7. H, J: n=5 per both groups]. Supplemental Figure 5G–K were presented as the mean and the standard error of the mean (SEM). To assess whether differences between *c-Maf*<sup>ΔTAM</sup> and *c-Maf*<sup>flx/flx</sup> mice were statistically significant, a minimum of three biological replicates were analyzed using Welch's t test, and a P-value < 0.05 was considered significant. NS: not significant. White circles- *c-Maf*<sup>flx/flx</sup> groups, and black circles- *c-Maf*<sup>ΔTAM</sup> groups.

**Supplemental Table 1.** Primer sequences for ChIP assays

| Gene                               | Forward/reverse primer sequence |                                 |
|------------------------------------|---------------------------------|---------------------------------|
| <i>c-Maf</i>                       | Forward                         | 5' -CTGCCGCTTCAAGAGGGTGCAGC-3'  |
|                                    | Reverse                         | 5' -TCGCGTTCACACTCACATG-3'      |
| <i>Sglt2</i>                       | Forward                         | 5' -CCCAGGAAGGAGTGCTCTTG-3'     |
|                                    | Reverse                         | 5' -GACAAGTCCCCCAGGTCTCA-3'     |
| <i>Sglt2</i><br>(negative control) | Forward                         | 5' -GGTCACCAGGCAAGTTAGGC-3'     |
|                                    | Reverse                         | 5' -CCCCAGACTGCACCTCCTTA-3'     |
| <i>Glut2</i>                       | Forward                         | 5' -TGGGGTAAAGGGTGTATTGATTG-3'  |
|                                    | Reverse                         | 5' -TGGAATTGTCCTCTTAATCCAGGT-3' |
| <i>Glut2</i><br>(negative control) | Forward                         | 5' -TCGTTAGGAATGAGGTGACACCA-3'  |
|                                    | Reverse                         | 5' -CAGGAAAATGAAAACCCCACA-3'    |

**Supplemental Table 2.** Primer sequences for dual luciferase assays and site-directed mutagenesis

| Gene                             | Forward/reverse primer sequence |                                               |
|----------------------------------|---------------------------------|-----------------------------------------------|
| <i>Sglt2</i><br>(transformation) | Forwar<br>d                     | 5' -ATATGGTACCACCAAATAAAAATCTGAGCATGGA-<br>3' |
|                                  | Revers<br>e                     | 5' -ATATCTCGAGGATTAATGGTTACCTCAGGAGCA-<br>3'  |
| <i>Sglt2</i><br>(sequence)       | Forwar<br>d                     | 5' -GGTACCACCAAATAAAAATCTGAGCATGGA-3'         |
|                                  | Revers<br>e                     | 5' -CTCGAGGATTAATGGTTACCTCAGGAGCA-3'          |
| <i>Sglt2</i><br>(mutagenesis)    | Forwar<br>d                     | 5' -AGGATTCAGCTAAATAAAGCTGGAGAA-3'            |
|                                  | Revers<br>e                     | 5' -GATCTATCAAGGCCGAAGGCTG-3'                 |
| <i>Glut2</i><br>(transformation) | Forwar<br>d                     | 5' -ATATACAGAGCCCACAGAACTAATTTTC-3'           |
|                                  | Revers<br>e                     | 5' -ATATGAATTTGCTTAGTAGCCAAAAGGA-3'           |
| <i>Glut2</i><br>(sequence)       | Forwar<br>d                     | 5' -CACTAAAATGCTGTGATTCCAACC-3'               |
|                                  | Revers<br>e                     | 5' -ATATGAATTTGCTTAGTAGCCAAAAGGA-3'           |



|                               |             |                                    |
|-------------------------------|-------------|------------------------------------|
| <i>Glut2</i><br>(mutagenesis) | Forwar<br>d | 5' -TCCTATTCATCCACATTCAGTACAGGA-3' |
|                               | Revers<br>e | 5' - GACCAGCCAGAGTGCTCACTCTA-3'    |

**Supplemental Table 3. Primer sequences for qPCR**

| Gene                  | Forward/reverse primer sequence |                                  |
|-----------------------|---------------------------------|----------------------------------|
| <i>Hprt</i>           | Forward                         | 5' -TTGTTGTTGGATATGCCCTTGACTA-3' |
|                       | Reverse                         | 5' -AGGCAGATGGCCACAGGACTA-3'     |
| <i>IRS1</i>           | Forward                         | 5' -GTTGAGTTGGGCAGAATAGGC-3'     |
|                       | Reverse                         | 5' -GGTATCCACATAGCTTTGACGAG-3'   |
| <i>IRS2</i>           | Forward                         | 5' -CAGTGGGGGCGAACTCTATG-3'      |
|                       | Reverse                         | 5' -CAGGCGTGGTTAGGGAATAAG-3'     |
| <i>Lrp2</i> (Megalin) | Forward                         | 5' -CAGTGGATTGGGTAGCAGGA-3'      |
|                       | Reverse                         | 5' -GCTTGGGGTCAACAACGATA-3'      |
| <i>Cubn</i> (Cubilin) | Forward                         | 5' -TCATTGGCCTCAGACATTCC-3'      |
|                       | Reverse                         | 5' -CCCAGACCTTCACAAAGCTG-3'      |
| <i>Sglt2</i>          | Forward                         | 5' -GCAACATCGGCAGCGGTCAT-3'      |
|                       | Reverse                         | 5' -GCGGAGGTACTGAGGCATTGTG-3'    |
| <i>Glut2</i>          | Forward                         | 5' -TCTTCACGGCTGTCTCTGTG-3'      |
|                       | Reverse                         | 5' -AATCATCCCGGTTAGGAACA-3'      |
| <i>c-Maf</i>          | Forward                         | 5' -GGTGGATTGTAGAGGGGAGAG-3'     |
|                       | Reverse                         | 5' -GTTACGGGGGAATTCAGGTT-3'      |
| <i>Glut1</i>          | Forward                         | 5' -ATGGATCCCAGCAGCAAG-3'        |
|                       | Reverse                         | 5' -CCAGTGTTATAGCCGAACTGC-3'     |
| <i>Sglt1</i>          | Forward                         | 5' -CACCATCTTGATCATCTCCTTCCT-3'  |
|                       | Reverse                         | 5' -TGCGTAGACTCCAACACAAAC-3'     |

|                                |         |                               |
|--------------------------------|---------|-------------------------------|
| <i>HNF1<math>\alpha</math></i> | Forward | 5' -AGAGACCTTGGTGGAGTGT-3'    |
|                                | Reverse | 5' -GGCAAACCAGTTGTAGACACGC-3' |
